# Supplementary material
Source: publisher figshare collection journal article supplement (https://acs.figshare.com/ndownloader/files/22437479)
Supplement: Supplementary file 1 [file 22437479]

## Sheet: Sheet1
Coumpounds	RI	Glycosylated Monoterpenes					Free Monoterpenes
		CK	T1	T2	T3		CK	T1	T2	T3
Pinene	1023	0.09±0.04	0.44±0.04	0.26±0.09	0.36±0.04		0.52±0.03	2.43±0.05	0.53±0.03	0.93±0.22
Myrcene	1161	0.25±0.02	1.5±0.26	0.29±0.29	0.92±0.05		1.2±0.06	5.35±0.01	1.83±0.12	2.92±0.39
Limonene	1197	0.04±0.01	1.06±0.1	0.06±0.01	0.96±0.01		0.23±0.02	5.47±0.09	1.34±0.02	4.25±0.03
Eucalyptol	1207	1.64±0.44	17.44±2.97	3.54±3.54	6.1±0.53		-	3.84±0.42	0.57±0.13	1.39±0.33
O-Cymol	1252	0.54±0.09	0.85±0.01	0.58±0.13	0.5±0.1		0.88±0.03	4.05±0.07	0.83±0.05	1.69±0.03
Nerol oxide	1471	0.13±0.01	7.97±0.75	0.18±0.18	3.29±0.9		9.58±1.51	22.56±3.02	9.26±1.94	14.52±4.32
Linalool oxide <cis->	1444	0.71±0.15	7.69±1.02	0.87±0.02	4.93±0.52		2.17±0.37	28.11±5.06	4.53±0.72	18.87±2.67
Pinocampheol	1469	0.6±0.16	5.14±0.28	1.39±1.39	9.16±0.44		1.72±0.31	5.15±0.37	1.84±0.68	1.73±0.63
Linalool	1542	1.11±0.16	118.63±7.44	4.29±0.26	41.36±9.95		8.8±2.53	162.15±31.12	26.46±3.35	104.87±28.19
Dehydrolinalool	1602	2.62±0.25	118.9±8.61	27.88±27.88	58.09±6.66		6.63±1.62	72.18±7.53	16.15±2.03	31.38±3.52
Terpinen-4-ol	1699	0.04±0.02	2.61±0.04	0.99±0.2	1.24±0.26		3.68±0.52	34.03 ± 7.38	6.33±1.88	27.42±3.35
Menthol	1627	1.57±0.2	1.99±0.34	1.87±1.87	1.83±0.34		2.25±0.62	7.57±0.01	2.19±0.74	4.38±0.89
α-Terpineol	1692	0.57±0.1	8.3±1.23	1.18±0.16	18.66±5.97		2.18±0.25	10.32±2.84	3.36±0.83	5.32±0.12
Linalool oxide (trans-pyranoid)	1446	-	6.51±1.13	0.31±0.31	13.21±3.97		-	7.63±1.94	0.26±0.09	12.12±1.34
Piperitenone oxide	1983	0.57±0.22	0.72±0.28	0.53±0.14	0.74±0.18		1.53±0.64	4.63±0.85	1.39±0.27	2.31±0.12
Naphthalene	1735	3.34±0.15	4.82±0.99	3.23±3.23	2.65±2.15		5.14±1.19	30.18±5.25	7.63±0.85	13.46±2.72
Citronellol	1763	0.77±0.08	7.05±0.65	0.84±0.21	13.19±1.55		5.96±0.67	36.87±3.06	7.74±1.07	16.95±2.82
Cuminaldehyde	1789	0.56±0.08	1.43±0.51	1.01±1.01	0.8±0.33		0.18±0.25	4.26±0.62	0.39±0.07	3.31±0.72
Geraniol	1837	6.51±1.07	25.39±5.18	1.14±0.4	15.93±0.55		8.18±0.25	53.18±5.25	10.39±1.27	35.31±2.12
Hotrienol	1597	-	10.3±1.6	-	8.31±0.86		3.24±1.17	12.6±0.75	4.47±0.45	20.76±3.79
Neranic acid	2332	-	2.2±0.34	-	1.32±0.12		5.76±6.17	25.5±1.91	11.26±0.92	17.76±2.53
Note: 1.RI – compound confirmed by retention index, Retention indices determined by HS-SPME/GC-MS on two different stationary phases ( DB-Wax).
2.Mean and standard deviation (n = 3) of the amount (μg/L) of glycosylated and free monoterpenes compounds of grapes or grapes berry skin treated with MeJA.
